# Supplementary material for: Harnessing the wealth of Chinese scientific literature: schistosomiasis research and control in China
Source: Springer Nature journal article supplement (doi:10.1186/1742-7622-5-19), 2008-09-30
Supplement: Additional file 1 [file 1742-7622-5-19-s1.pdf]

分析透视

中国科学文献宝库的利用：中国血吸虫病研究与防治

作者：

刘琴(Qin Liu), 田利光(Li-Guang Tian), 肖树华(Shu-Hua Xiao),  
郑琪(Zhen Qi), 彼得·斯大曼(Peter Steinmann), 愁毕·马克  
(Tippi Mak), 云格·乌辛格(Jürg Utzinger), 周晓农(Xiao-Nong  
Zhou)

摘要：

与中国经济持续繁荣同步，生物医学研究与相应的文献发表也在增多。在发展中国家流行普遍的“被忽略的热带疾病”仍流行或重新流行于中国的部分地区。本文的目的是以中国血吸虫流行病学和控制研究为例，表明中国生物医学数据库的重要科研潜力。我们搜索了两大数据库，即中国知识基础设施(CNKI)和维普资讯(VIP)，搜索使用关键词为“血吸虫”，时间期限为1990-2006年。在CNKI共搜索到10,244篇文章，在VIP共搜索到5,975篇文章。统计发表血吸虫病论著最多的10本生物医学期刊，包括了出版语言及是否免费获取等内容，发现大部分期刊都以中文发表，并通常同时提供英文摘要。在

这些期刊中，只有《中国热带医学》2005-2006 年的部分文章以及《中国寄生虫学与寄生虫病杂志》2003 年以后的文章可免费获取。我们从以下三方面综述了过去 20 年中国血吸虫病研究成果：（1）抗血吸虫药的研发进展；（2）灭螺药的研究进展；（3）血吸虫病防治中的环境治理研究。总之，中文文献中发表了很多重要的科研成果，既涉及了当地的防控策略，也有全球的科学知识。今后应鼓励免费开放文献，同时消除语言障碍，使中国的科研被全球科学界所认识。

译者：

刘琴 (Qin Liu)，周晓农 (Xiao-Nong Zhou)
