# Supplementary material for: Harnessing the wealth of Chinese scientific literature: schistosomiasis research and control in China
Source: Springer Nature journal article supplement (doi:10.1186/1742-7622-5-19), 2008-09-30
Supplement: Additional file 2 [file 1742-7622-5-19-s2.pdf]

Traditional Chinese / 繁體中文

分析透視

## 中國科學文獻寶庫的利用：中國血吸蟲病研究與防治

作者：

劉琴 (Qin Liu), 田利光 (Li-Guang Tian), 肖樹華 (Shu-Hua Xiao),  
鄭琪 (Zhen Qi), 彼得·斯大曼 (Peter Steinmann), 愁畢·馬克  
(Tippi Mak), 雲格·烏辛格 (Jürg Utzinger), 周曉農 (Xiao-Nong  
Zhou)

摘要：

與中國經濟持續繁榮同步，生物醫學研究與相應的文獻發表也在增多。在發展中國家流行普遍的「被忽略的熱帶疾病」仍流行或重新流行於中國的部分地區。本文的目的是以中國血吸蟲流行病學和控制研究為例，表明中國生物醫學數據庫的重要科研潛力。我們搜索了兩大數據庫，即中國知識基礎設施 (CNKI) 和維普資訊 (VIP)，搜索使用關鍵詞為「血吸蟲」，時間期限為 1990-2006 年。在 CNKI 共搜索到 10,244 篇文章，在 VIP 共搜索到 5,975 篇文章。統計發表血吸蟲病論著最多的 10 本生物醫學期刊，包括了出版語言及是否免費獲取等內容，發現大部分期刊都以中文發表，並通常同時提供英文摘

要。在這些期刊中，只有《中國熱帶醫學》2005-2006 年的部分文章以及《中國寄生蟲學與寄生蟲病雜誌》2003 年以後的文章可免費獲取。我們從以下三方面綜述了過去 20 年中國血吸蟲病研究成果：(1) 抗血吸蟲藥的研發進展；(2) 滅螺藥的研究進展；(3) 血吸蟲病防治中的環境治理研究。總之，中文文獻中發表了很多重要的科研成果，既涉及了當地的防控策略，也有全球的科學知識。今後應鼓勵免費開放文獻，同時消除語言障礙，使中國的科研被全球科學界所認識。

譯者：

劉琴 (Qin Liu)，周曉農 (Xiao-Nong Zhou)
